# Supplementary material for: Continuous flow synthesis of small silver nanoparticles involving hydrogen as the reducing agent
Source: Royal Society of Chemistry journal article supplement (doi:10.1039/c000708k), 2010-01-01
Supplement: c000708k.pdf [file c000708k.pdf]

## Continuous flow synthesis of small silver nanoparticles *via* process intensification and hydrogen reduction

Karel J. Hartlieb<sup>a,b</sup>, Martin Saunders<sup>b</sup>, Colin L. Raston<sup>a</sup> and Roshan J. J. Jachuck<sup>c</sup>

### Supporting Information

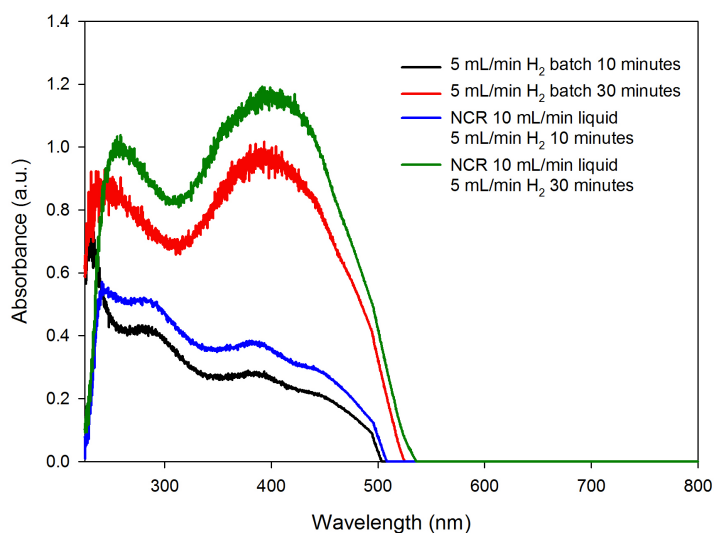

**Figure S1** - UV-Vis absorption spectra comparing batch to a recirculating narrow-channel reactor after 10 and 30 minutes at same hydrogen flow rate for a 200 mL reagent volume

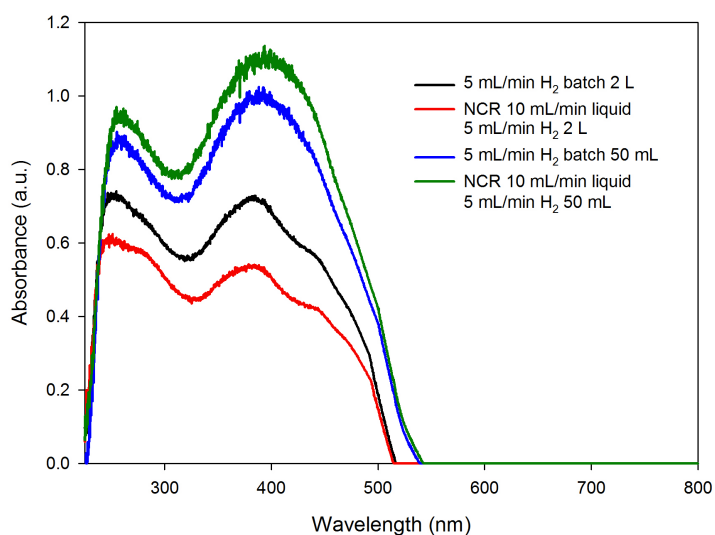

**Figure S2** - UV-Vis absorption spectra comparing batch to narrow-channel reactor after 30 minutes at same hydrogen flow rate for 50 mL and 2 L reagent volume

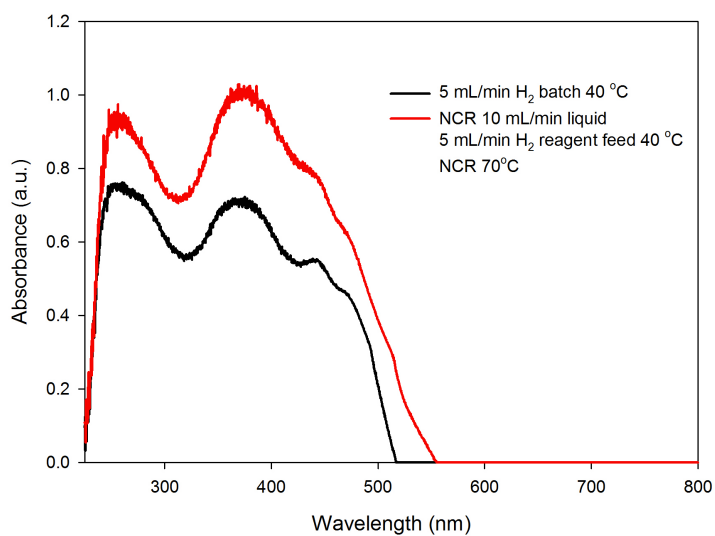

**Figure S3** - UV-Vis spectra comparing optical properties of colloidal silver solution after 120 minutes between a batch reaction at 40 °C and a recirculating NCR experiment with a reagent feed solution temperature of 40 °C and an NCR temperature of 70 °C

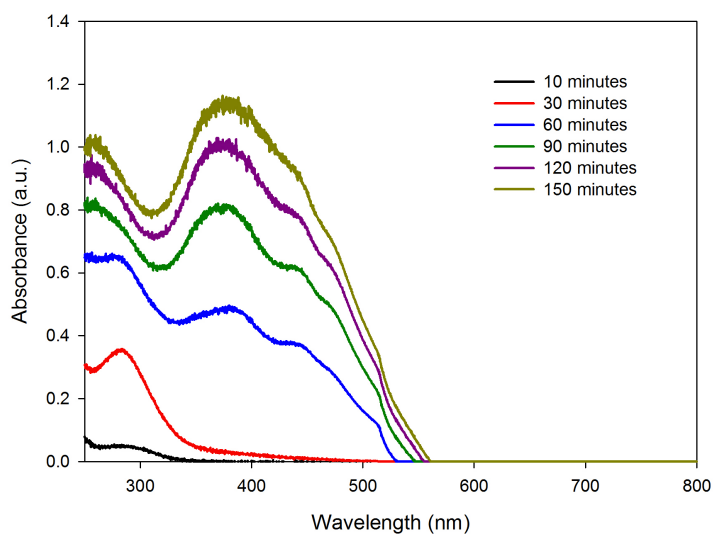

**Figure S4** - Evolution of the optical properties of a colloidal silver nanoparticle solution during an NCR experiment using 0.05 %w/v NaPP with 40 °C reagent feed solution temperature and 70 °C NCR temperature

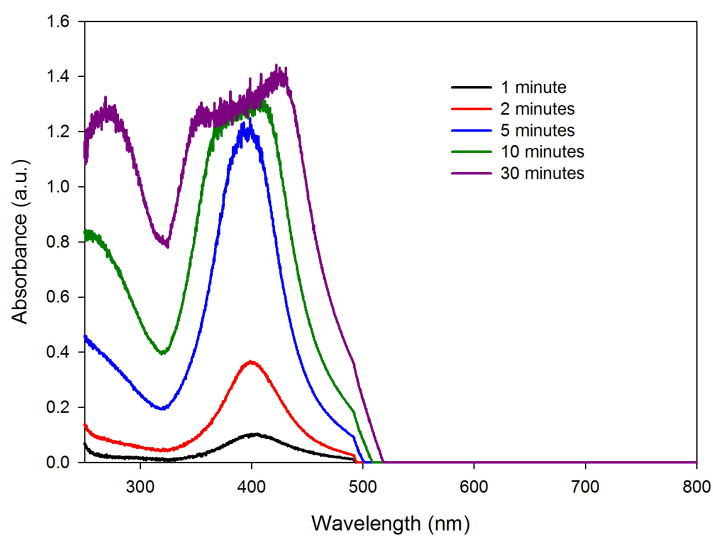

**Figure S5** - UV-Vis absorption spectra of silver nanoparticles produced with 0.05 %w/v tripolyphosphate at various times from a recirculating NCR experiment with a reagent feed solution temperature and NCR temperature of 70 °C

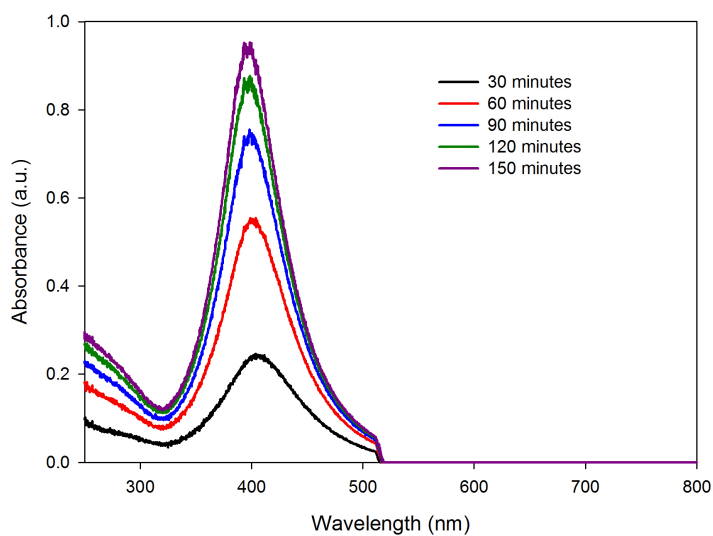

**Figure S6** - UV-Vis absorption spectra of silver nanoparticles produced with 0.005 %w/v tripolyphosphate at various times from a recirculating NCR experiment with a reagent feed solution temperature and NCR temperature of 70 °C

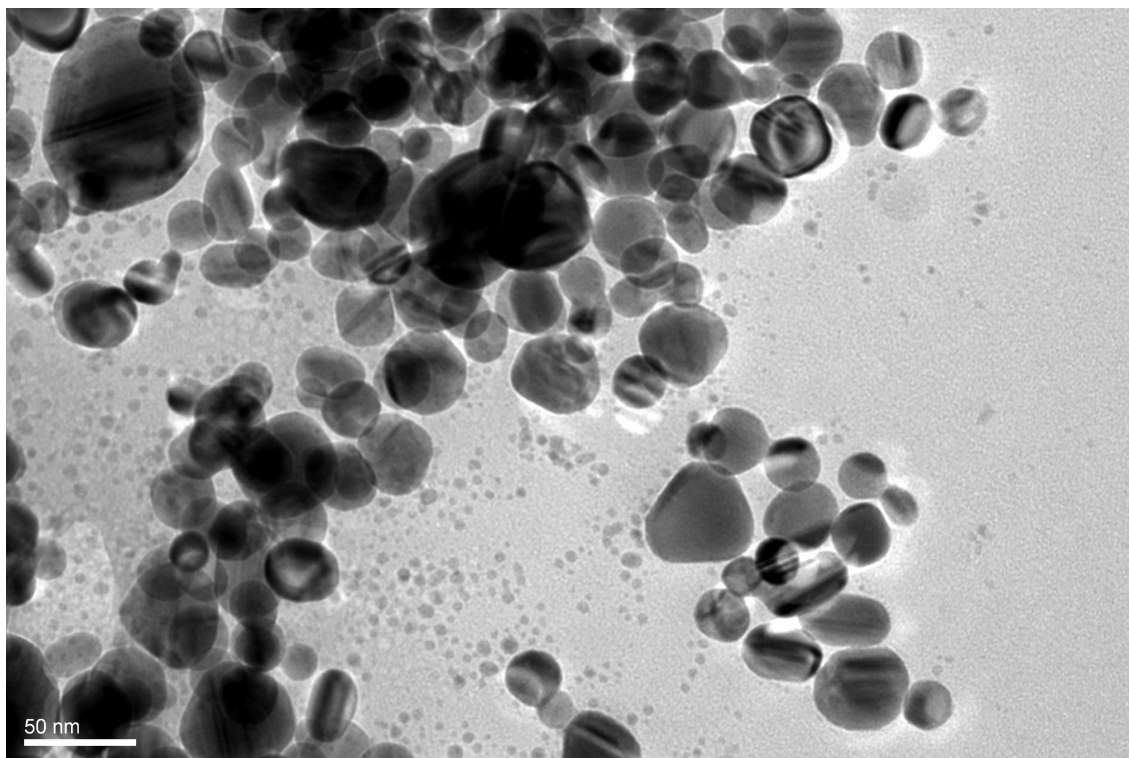

**Figure S7** - TEM of silver nanoparticles produced with 0.05 %w/v NaTPP for a recirculating NCR experiment at 70 °C after 30 minutes
